# Supplementary material for: Can Reduced Irrigation Mitigate Ozone Impacts on an Ozone-Sensitive African Wheat Variety?
Source: PubMed Central journal article supplement (PMC6681504; doi:10.3390/plants8070220), 2019-07-12
Supplement: plants-08-00220-s001.pdf [file plants-08-00220-s001.pdf]

**Table S1.** Post-hoc test results (p-values) for mixed model investigating the effect of varying water treatments (WW: well-watered; FD: frequent deficit; ID: infrequent deficit) and O<sub>3</sub> treatments (low O<sub>3</sub> = 30 ppb, high O<sub>3</sub> = 80 ppb) on stomatal conductance (g<sub>s</sub>; mmol H<sub>2</sub>O m<sup>-2</sup> s<sup>-1</sup>). The values show **differences between dates** (1 - 5 = 3<sup>rd</sup>, 10<sup>th</sup>, 17<sup>th</sup>, 24<sup>th</sup> and 31<sup>st</sup> July 2018 respectively) for each time of day. Bold p-values show statistical significance (p ≤ 0.05).

| a)   |        | Time of day |               |        |               |      |        | Time of day       |                   |                   |                   |
|------|--------|-------------|---------------|--------|---------------|------|--------|-------------------|-------------------|-------------------|-------------------|
| WW30 | Date   | 10:00       | 12:00         | 14:00  | 15:30         | WW80 | Date   | 10:00             | 12:00             | 14:00             | 15:30             |
|      | 1 vs 2 | 0.8525      | 0.9827        | 0.1267 | 1.0000        |      | 1 vs 2 | 0.9999            | 0.9928            | 0.9975            | 0.9487            |
|      | 1 vs 3 | 0.9996      | 0.9308        | 0.1105 | 0.8059        |      | 1 vs 3 | <b>&lt;0.0001</b> | <b>0.0051</b>     | <b>&lt;0.0001</b> | <b>0.0001</b>     |
|      | 1 vs 4 | 0.4201      | <b>0.0050</b> | 0.6507 | <b>0.0088</b> |      | 1 vs 4 | <b>&lt;0.0001</b> | <b>&lt;0.0001</b> | <b>&lt;0.0001</b> | <b>&lt;0.0001</b> |
|      | 1 vs 5 | 0.9943      | 0.9033        | 0.9981 | 0.999         |      | 1 vs 5 | <b>&lt;0.0001</b> | <b>&lt;0.0001</b> | <b>&lt;0.0001</b> | <b>&lt;0.0001</b> |
|      | 2 vs 3 | 0.7436      | 0.6654        | 1.0000 | 0.8383        |      | 2 vs 3 | <b>&lt;0.0001</b> | <b>0.0204</b>     | <b>&lt;0.0001</b> | <b>&lt;0.0001</b> |
|      | 2 vs 4 | 0.0522      | <b>0.0282</b> | 0.8524 | <b>0.0109</b> |      | 2 vs 4 | <b>&lt;0.0001</b> | <b>&lt;0.0001</b> | <b>&lt;0.0001</b> | <b>&lt;0.0001</b> |
|      | 2 vs 5 | 0.9748      | 0.9971        | 0.2376 | 0.9977        |      | 2 vs 5 | <b>&lt;0.0001</b> | <b>&lt;0.0001</b> | <b>&lt;0.0001</b> | <b>&lt;0.0001</b> |
|      | 3 vs 4 | 0.5517      | <b>0.0002</b> | 0.8239 | 0.1732        |      | 3 vs 4 | <b>&lt;0.0001</b> | <b>0.0229</b>     | 0.0951            | <b>0.0199</b>     |
|      | 3 vs 5 | 0.9731      | 0.4475        | 0.2120 | 0.6554        |      | 3 vs 5 | <b>&lt;0.0001</b> | <b>&lt;0.0001</b> | <b>&lt;0.0001</b> | <b>&lt;0.0001</b> |
|      | 4 vs 5 | 0.2104      | 0.0709        | 0.8263 | <b>0.0037</b> |      | 4 vs 5 | 0.1361            | <b>&lt;0.0001</b> | <b>0.0005</b>     | 0.1564            |

  

| b)   |        | Time of day   |                   |                   |                   |      |        | Time of day       |                   |                   |               |
|------|--------|---------------|-------------------|-------------------|-------------------|------|--------|-------------------|-------------------|-------------------|---------------|
| FD30 | Date   | 10:00         | 12:00             | 14:00             | 15:30             | FD80 | Date   | 10:00             | 12:00             | 14:00             | 15:30         |
|      | 1 vs 2 | <b>0.0041</b> | 0.1026            | <b>0.0331</b>     | <b>&lt;0.0001</b> |      | 1 vs 2 | <b>0.0017</b>     | 0.3928            | 0.5159            | 0.2463        |
|      | 1 vs 3 | <b>0.0012</b> | <b>&lt;0.0001</b> | <b>0.0007</b>     | <b>0.0001</b>     |      | 1 vs 3 | 0.1413            | 0.0795            | 0.8243            | 0.0778        |
|      | 1 vs 4 | <b>0.0312</b> | 0.0572            | <b>&lt;0.0001</b> | <b>&lt;0.0001</b> |      | 1 vs 4 | 0.6443            | 0.9675            | <b>0.0103</b>     | 0.7542        |
|      | 1 vs 5 | 0.1367        | 0.9993            | 0.9996            | 0.9808            |      | 1 vs 5 | <b>&lt;0.0001</b> | <b>0.0244</b>     | 0.0909            | 0.3800        |
|      | 2 vs 3 | 0.9970        | 0.0502            | 0.7940            | 0.9120            |      | 2 vs 3 | 0.5847            | 0.9314            | 0.9865            | 0.9844        |
|      | 2 vs 4 | 0.9696        | 0.9993            | <b>0.0218</b>     | 0.4217            |      | 2 vs 4 | <b>&lt;0.0001</b> | 0.1144            | <b>&lt;0.0001</b> | <b>0.0116</b> |
|      | 2 vs 5 | 0.7436        | 0.0569            | <b>0.0182</b>     | <b>&lt;0.0001</b> |      | 2 vs 5 | <b>&lt;0.0001</b> | <b>&lt;0.0001</b> | <b>0.0006</b>     | <b>0.0014</b> |
|      | 3 vs 4 | 0.8664        | 0.0912            | 0.3111            | 0.0770            |      | 3 vs 4 | <b>0.0025</b>     | <b>0.0128</b>     | <b>0.0002</b>     | <b>0.0019</b> |
|      | 3 vs 5 | 0.5275        | <b>&lt;0.0001</b> | <b>0.0003</b>     | <b>0.0013</b>     |      | 3 vs 5 | <b>&lt;0.0001</b> | <b>&lt;0.0001</b> | <b>0.0038</b>     | <b>0.0002</b> |
|      | 4 vs 5 | 0.9778        | <b>0.0299</b>     | <b>&lt;0.0001</b> | <b>&lt;0.0001</b> |      | 4 vs 5 | <b>0.0027</b>     | 0.1309            | 0.9400            | 0.9754        |

| c)   |        | Time of day |         |        |         | Time of day |        |         |         |         |        |
|------|--------|-------------|---------|--------|---------|-------------|--------|---------|---------|---------|--------|
| ID30 | Date   | 10:00       | 12:00   | 14:00  | 15:30   | ID80        | Date   | 10:00   | 12:00   | 14:00   | 15:30  |
|      | 1 vs 2 | <0.0001     | 0.0004  | 0.7728 | <0.0001 |             | 1 vs 2 | 0.0011  | 0.1255  | 0.0543  | 0.0135 |
|      | 1 vs 3 | <0.0001     | 0.0009  | 0.3982 | <0.0001 |             | 1 vs 3 | 0.6192  | 0.0713  | 0.9410  | 0.7028 |
|      | 1 vs 4 | <0.0001     | 0.0076  | 0.0415 | <0.0001 |             | 1 vs 4 | 0.1374  | 0.9010  | 0.9505  | 0.9203 |
|      | 1 vs 5 | <0.0001     | <0.0001 | 0.7347 | <0.0001 |             | 1 vs 5 | <0.0001 | 0.0448  | 0.0026  | 0.9970 |
|      | 2 vs 3 | 0.9835      | 0.9998  | 0.9751 | 0.9997  |             | 2 vs 3 | <0.0001 | 0.9993  | 0.2920  | 0.3131 |
|      | 2 vs 4 | 0.7082      | 0.9393  | 0.4648 | 0.6656  |             | 2 vs 4 | <0.0001 | 0.0109  | 0.0060  | 0.0007 |
|      | 2 vs 5 | 0.9138      | 0.9546  | 1.0000 | 0.4335  |             | 2 vs 5 | <0.0001 | <0.0001 | <0.0001 | 0.0378 |
|      | 3 vs 4 | 0.9478      | 0.9751  | 0.8298 | 0.7828  |             | 3 vs 4 | 0.8888  | 0.0049  | 0.5713  | 0.2172 |
|      | 3 vs 5 | 0.9978      | 0.9050  | 0.9838 | 0.3195  |             | 3 vs 5 | 0.0026  | <0.0001 | 0.0001  | 0.8823 |
|      | 4 vs 5 | 0.9934      | 0.5785  | 0.5070 | 0.0214  |             | 4 vs 5 | 0.0481  | 0.3200  | 0.0280  | 0.7645 |

**Table S2.** Post-hoc test results (p-values) for mixed model investigating the effect of varying water treatments (WW: well-watered; FD: frequent deficit; ID: infrequent deficit) and O<sub>3</sub> treatments (low O<sub>3</sub> = 30 ppb, high O<sub>3</sub> = 80 ppb) on stomatal conductance (g<sub>s</sub>; mmol H<sub>2</sub>O m<sup>-2</sup> s<sup>-1</sup>). The values show **differences between times of day** for each date in 2018. Bold p-values show statistical significance (p ≤ 0.05).

| a) WW30            |                      |                       |                       |                       |                       | WW80               |                      |                       |                       |                       |                       |
|--------------------|----------------------|-----------------------|-----------------------|-----------------------|-----------------------|--------------------|----------------------|-----------------------|-----------------------|-----------------------|-----------------------|
|                    | 3 <sup>rd</sup> July | 10 <sup>th</sup> July | 17 <sup>th</sup> July | 24 <sup>th</sup> July | 31 <sup>st</sup> July |                    | 3 <sup>rd</sup> July | 10 <sup>th</sup> July | 17 <sup>th</sup> July | 24 <sup>th</sup> July | 31 <sup>st</sup> July |
| <b>Time of day</b> |                      |                       |                       |                       |                       | <b>Time of day</b> |                      |                       |                       |                       |                       |
| 10:00 vs 12:00     | 0.9780               | 0.7154                | 0.4625                | 0.1974                | 0.7950                | 10:00 vs 12:00     | 0.7727               | 0.5627                | 0.7867                | 0.1743                | 0.1818                |
| 10:00 vs 14:00     | 0.9871               | <b>0.0011</b>         | <b>0.0374</b>         | 0.9989                | 0.7292                | 10:00 vs 14:00     | 0.9758               | 0.9281                | 0.9672                | 0.2719                | 0.9908                |
| 10:00 vs 15:30     | 0.7616               | 0.1931                | 0.2132                | <b>0.0239</b>         | 0.6960                | 10:00 vs 15:30     | <b>0.0044</b>        | 0.0662                | 0.2859                | 0.9995                | 0.9900                |
| 12:00 vs 14:00     | 0.9046               | 0.1036                | <b>0.0012</b>         | 0.2842                | 1.0000                | 12:00 vs 14:00     | 0.9437               | 0.8900                | 0.5608                | 0.9804                | 0.3314                |
| 12:00 vs 15:30     | 0.5988               | 0.8863                | <b>0.0111</b>         | 0.9345                | 0.9999                | 12:00 vs 15:30     | 0.1731               | 0.7970                | 0.0690                | 0.1656                | 0.3354                |
| 14:00 vs 15:30     | 0.9279               | 0.3292                | 0.8905                | 0.0513                | 0.9999                | 14:00 vs 15:30     | <b>0.0257</b>        | 0.2898                | 0.5945                | 0.2631                | 1.0000                |

| b) FD30            |                      |                       |                       |                       |                       | FD80               |                      |                       |                       |                       |                       |
|--------------------|----------------------|-----------------------|-----------------------|-----------------------|-----------------------|--------------------|----------------------|-----------------------|-----------------------|-----------------------|-----------------------|
|                    | 3 <sup>rd</sup> July | 10 <sup>th</sup> July | 17 <sup>th</sup> July | 24 <sup>th</sup> July | 31 <sup>st</sup> July |                    | 3 <sup>rd</sup> July | 10 <sup>th</sup> July | 17 <sup>th</sup> July | 24 <sup>th</sup> July | 31 <sup>st</sup> July |
| <b>Time of day</b> |                      |                       |                       |                       |                       | <b>Time of day</b> |                      |                       |                       |                       |                       |
| 10:00 vs 12:00     | 0.6587               | 0.1158                | 0.9984                | 0.5186                | <b>0.0014</b>         | 10:00 vs 12:00     | 0.9035               | <b>0.0368</b>         | 0.9720                | 1.0000                | 0.5232                |
| 10:00 vs 14:00     | <b>0.0382</b>        | <b>0.0053</b>         | 0.0535                | 0.9874                | <b>&lt;0.0001</b>     | 10:00 vs 14:00     | 0.9464               | <b>0.0308</b>         | 0.2723                | 0.0696                | 0.1964                |
| 10:00 vs 15:30     | <b>0.0001</b>        | <b>0.0344</b>         | <b>0.0006</b>         | 0.9826                | <b>&lt;0.0001</b>     | 10:00 vs 15:30     | <b>0.0003</b>        | <b>&lt;0.0001</b>     | <b>0.0008</b>         | <b>0.0006</b>         | 0.8244                |
| 12:00 vs 14:00     | 0.4166               | 0.6878                | <b>0.0344</b>         | 0.3243                | 0.4365                | 12:00 vs 14:00     | 0.9992               | 0.9999                | 0.5194                | 0.0619                | 0.9253                |
| 12:00 vs 15:30     | <b>0.0060</b>        | 0.9617                | <b>0.0003</b>         | 0.7492                | 0.0609                | 12:00 vs 15:30     | <b>0.0038</b>        | <b>0.0096</b>         | <b>0.0040</b>         | <b>0.0005</b>         | 0.1190                |
| 14:00 vs 15:30     | 0.2923               | 0.9272                | 0.5219                | 0.8961                | 0.7466                | 14:00 vs 15:30     | <b>0.0024</b>        | <b>0.0117</b>         | 0.1705                | 0.4494                | <b>0.0245</b>         |

| c) ID30            |                      |                       |                       |                       |                       | ID80               |                      |                       |                       |                       |                       |
|--------------------|----------------------|-----------------------|-----------------------|-----------------------|-----------------------|--------------------|----------------------|-----------------------|-----------------------|-----------------------|-----------------------|
|                    | 3 <sup>rd</sup> July | 10 <sup>th</sup> July | 17 <sup>th</sup> July | 24 <sup>th</sup> July | 31 <sup>st</sup> July |                    | 3 <sup>rd</sup> July | 10 <sup>th</sup> July | 17 <sup>th</sup> July | 24 <sup>th</sup> July | 31 <sup>st</sup> July |
| <b>Time of day</b> |                      |                       |                       |                       |                       | <b>Time of day</b> |                      |                       |                       |                       |                       |
| 10:00 vs 12:00     | 0.9996               | 0.1599                | 0.3148                | 0.3896                | 0.9524                | 10:00 vs 12:00     | 0.3276               | 0.0078                | 0.0942                | 0.9945                | 0.9285                |
| 10:00 vs 14:00     | 0.2536               | <b>0.0055</b>         | 0.1286                | 0.9783                | 0.0781                | 10:00 vs 14:00     | 0.1987               | <b>0.0094</b>         | 0.9972                | 0.9828                | 0.9429                |
| 10:00 vs 15:30     | <b>0.0013</b>        | <b>0.0024</b>         | <b>0.0256</b>         | 0.7774                | <b>0.0001</b>         | 10:00 vs 15:30     | <b>&lt;0.0001</b>    | <b>&lt;0.0001</b>     | 0.0814                | <b>0.0023</b>         | 0.9847                |
| 12:00 vs 14:00     | 0.3047               | 0.6028                | 0.9657                | 0.6377                | 0.2391                | 12:00 vs 14:00     | 0.9921               | 0.9999                | 0.1462                | 0.9994                | 0.6436                |
| 12:00 vs 15:30     | <b>0.0008</b>        | 0.4527                | 0.6834                | 0.9213                | <b>0.0007</b>         | 12:00 vs 15:30     | <b>0.0045</b>        | 0.0521                | <b>&lt;0.0001</b>     | <b>0.0054</b>         | 0.9940                |
| 14:00 vs 15:30     | <b>&lt;0.0001</b>    | 0.9952                | 0.9186                | 0.9463                | 0.1875                | 14:00 vs 15:30     | <b>0.0112</b>        | <b>0.0446</b>         | <b>0.0497</b>         | <b>0.0080</b>         | 0.7955                |
